# Supplementary material
Source: Springer Nature journal article supplement (https://www.springermedizin.de/resource/supplementary/13054_2013_1903_MOESM3_ESM.pdf/9711892)

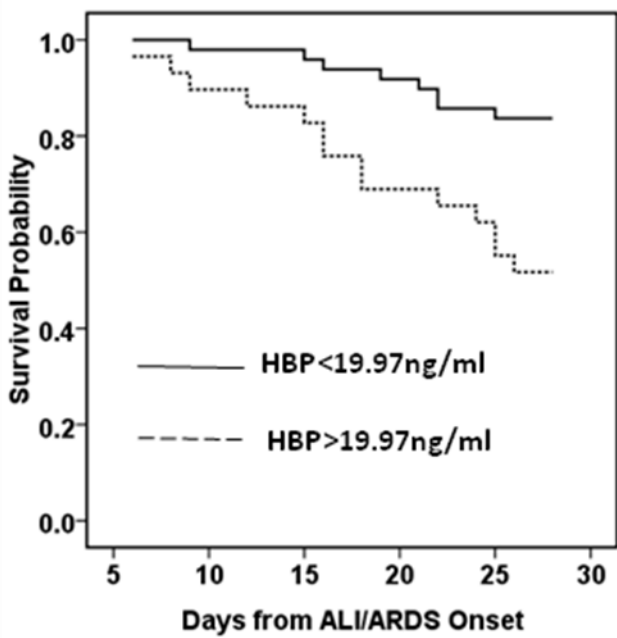

Supplement: MOESM3 [file 9711892]
